# Supplementary material for: Heat Shock Protein 27 Phosphorylation Regulates Tumor Cell Migration under Shear Stress
Source: PubMed Central journal article supplement (PMC6406706; doi:10.3390/biom9020050), 2019-01-30
Supplement: biomolecules-09-00050-s001.pdf [file biomolecules-09-00050-s001.pdf]

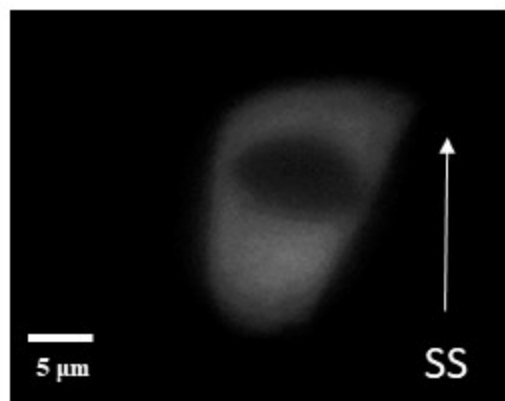

A

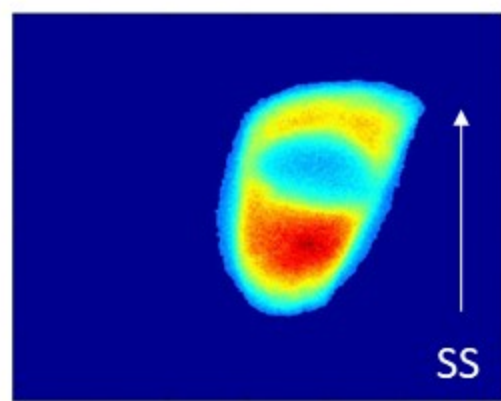

B

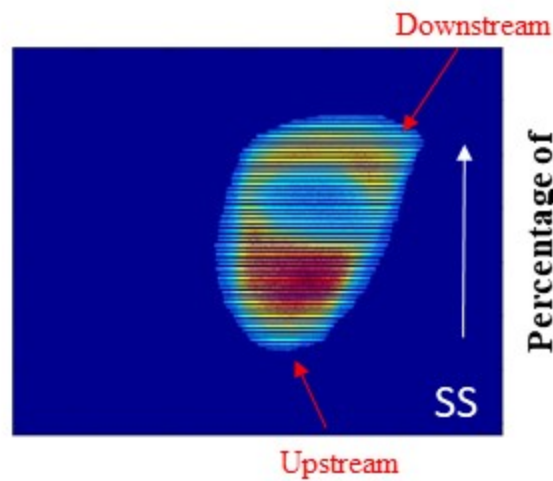

C

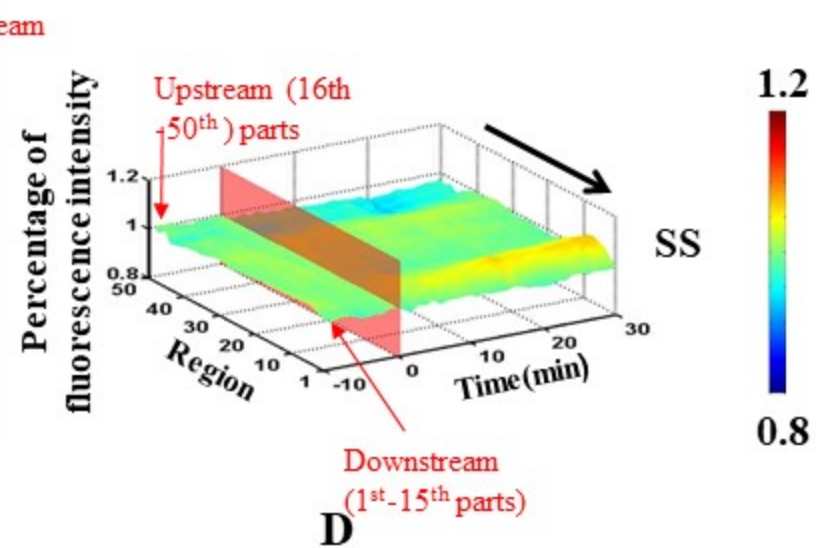

D
