# Supplementary material for: Heat Shock Protein 27 Phosphorylation Regulates Tumor Cell Migration under Shear Stress
Source: MDPI journal article supplement (doi:10.3390/biom9020050), 2019-01-30
Supplement: s1 [file s1]

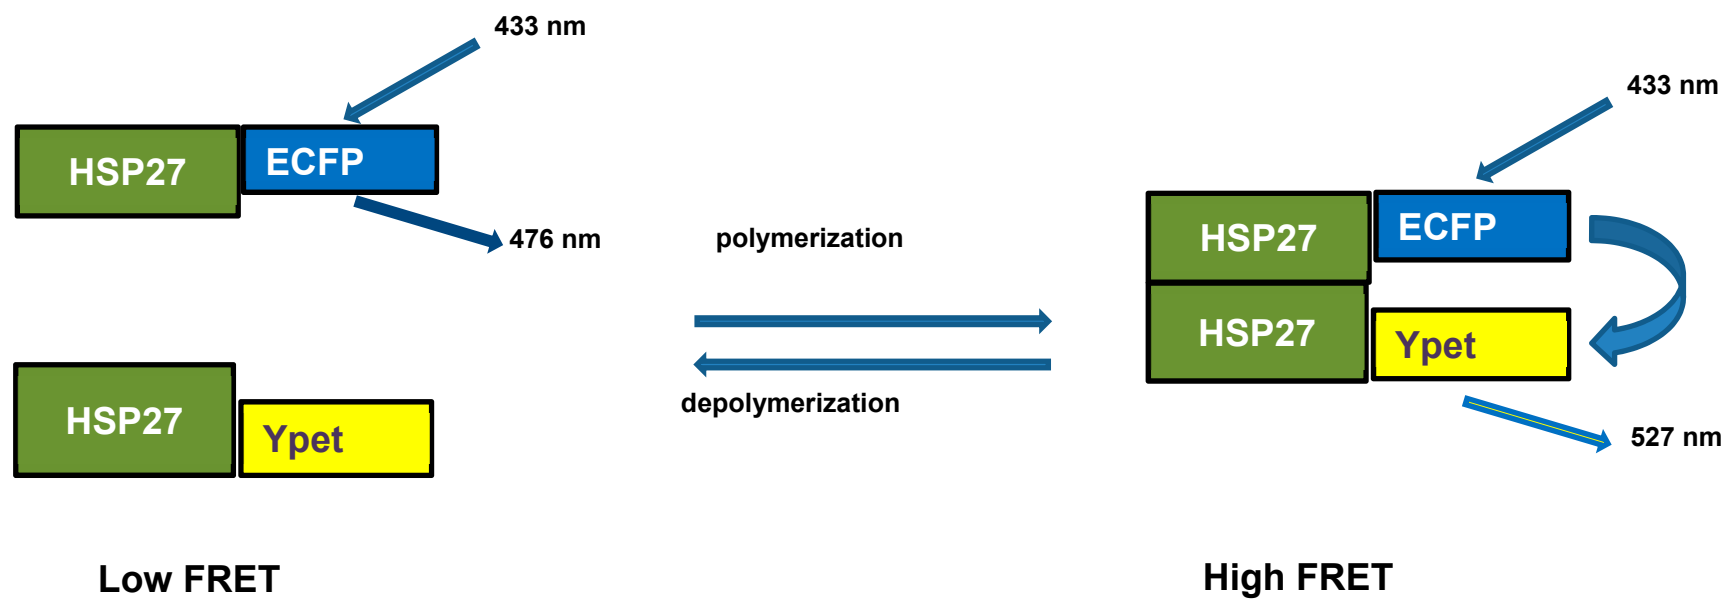

**Figure S1.** The schematic diagram of HSP27 self-polymerization probe.

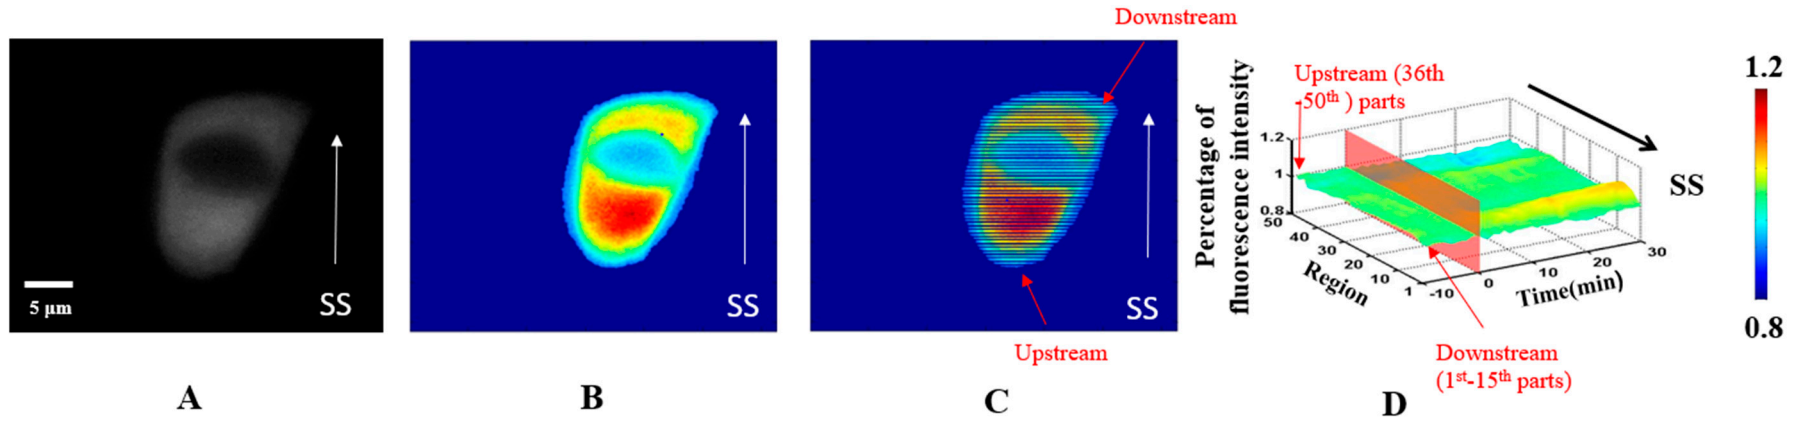

**Figure S2.** Image processing scheme. A) Original image B). Background ground removed C). Image divided into 50 parts along the direction of shear stress equally D). The fluorescence intensity of each part at the previous moment of stimulation is used as a reference to normalize fluorescence intensity, then a three-dimensional (3D) graph of time, space and fluorescence intensity is drawn (ref. [28, 29]).
